# Supplementary material for: Acid-induced nitrite reduction of nonheme iron(ii)-nitrite: mimicking biological Fe–NiR reactions
Source: Royal Society of Chemistry journal article supplement (doi:10.1039/d2sc06704h), 2023-01-01
Supplement: d2sc06704h1.pdf [file d2sc06704h1.pdf]

## Supporting Information

### **Acid-induced Nitrite Reduction of a Nonheme Iron(II)- Nitrite: Mimicking biological Fe-NiR Reaction**

Kulbir,<sup>a</sup> Sandip Das,<sup>a</sup> Tarali Devi,<sup>c</sup> Somnath Ghosh,<sup>a</sup> Subash Chandra Sahoo,<sup>b</sup>  
Pankaj Kumar<sup>\*a</sup>

<sup>a</sup>Department of Chemistry, Indian Institute of Science Education and Research (IISER),  
Tirupati 517507, India

<sup>b</sup>Department of Chemistry, Punjab University, Punjab, Chandigarh, India

<sup>c</sup>Humboldt-Universität zu Berlin, Institut für Chemie, Brook-Taylor-Straße 2, D-12489  
Berlin, Germany

\* To whom correspondence should be addressed.

E-mail: [pankaj@iisertirupati.ac.in](mailto:pankaj@iisertirupati.ac.in)

## Table of Contents

### Experimental Section

|                                                                                                                 |     |
|-----------------------------------------------------------------------------------------------------------------|-----|
| Materials and Instrumentation                                                                                   | S3  |
| Synthesis of [(12-TMC)Fe <sup>II</sup> (CH <sub>3</sub> CN)](OTf) <sub>2</sub> ( <b>1</b> )                     | S3  |
| Synthesis of [(12-TMC)Fe <sup>II</sup> (NO <sub>2</sub> <sup>-</sup> )](OTf) ( <b>2</b> )                       | S3  |
| Synthesis of Iron-nitrosyl species ({FeNO} <sup>7</sup> , <b>3</b> ) (Reaction of <b>2</b> + H <sup>+</sup> ).  | S4  |
| Synthesis of {FeNO} <sup>7</sup> (Reaction of <b>1</b> + NO gas)                                                | S4  |
| Reactivity Studies                                                                                              | S4  |
| <sup>14/15</sup> N-labeling Experiments by FT-IR Spectroscopy (Reduction of NO <sub>2</sub> <sup>-</sup> to NO) | S5  |
| <sup>14/15</sup> N-labeling Experiments by ESI-Mass Spectrometry                                                | S5  |
| Magnetic moment calculation using Evans NMR                                                                     | S5  |
| Calculation of Binding Constant( <i>K<sub>b</sub></i> )                                                         | S6  |
| Qualitative and quantitative estimation of H <sub>2</sub> O <sub>2</sub> by <sup>1</sup> H-NMR                  | S7  |
| Estimation of H <sub>2</sub> O <sub>2</sub> ( <i>Iodometric-titration</i> )                                     | S8  |
| Detection of Fe <sup>II</sup> (ONOH)intermediate                                                                | S8  |
| Reaction monitoring using EPR spectroscopy                                                                      | S9  |
| Bond valance calculations                                                                                       | S9  |
| Nitric Oxide Preparation and Purification                                                                       | S9  |
| Single-Crystal XRD Studies.                                                                                     | S10 |
| References                                                                                                      | S11 |
| Table T1. Crystallographic data for <b>2</b> and <b>3</b>                                                       | S12 |
| Table T2. Selected bond lengths (Å) and bond angles (°) for <b>2</b> and <b>3</b>                               | S13 |
| Figure S1                                                                                                       | S14 |
| Figure. S2                                                                                                      | S15 |
| Figure S3                                                                                                       | S16 |
| Figure S4                                                                                                       | S17 |
| Figure S5                                                                                                       | S18 |
| Figure S6                                                                                                       | S19 |
| Figure S7                                                                                                       | S20 |
| Figure S8                                                                                                       | S21 |
| Figure S9                                                                                                       | S22 |
| Figure S10                                                                                                      | S23 |
| Figure S11                                                                                                      | S24 |
| Figure S12                                                                                                      | S25 |
| Figure S13                                                                                                      | S26 |
| Figure S14                                                                                                      | S27 |
| Figure S15                                                                                                      | S28 |
| Figure S16                                                                                                      | S29 |
| Figure S17                                                                                                      | S30 |
| Figure S18                                                                                                      | S31 |
| Figure S19                                                                                                      | S32 |
| Figure S20                                                                                                      | S33 |
| Figure S21                                                                                                      | S34 |
| Figure S22                                                                                                      | S35 |

**Materials:** All the reagents and solvents obtained from commercial sources (Sigma Aldrich Chemical Co. and Tokyo Chemical Industry) were of the best available purity and used without further purification unless otherwise indicated. Solvents were dried according to reported literature and distilled under an inert atmosphere before use.<sup>S1</sup> Na<sup>15</sup>NO<sub>2</sub> (99.2% <sup>15</sup>N-enriched) was purchased from ICON Services Inc. (Summit, NJ, USA). The 12TMC ligand was prepared by reacting excess amounts of formaldehyde and formic acid with 1,4,7,10-tetraazacyclododecane as reported previously.<sup>S2</sup>

**Instrumentation:** UV-vis spectra were recorded on an Agilent tech 8454 diode array spectrometer equipped with a thermostat cell holder (UNISOKU Scientific Instruments) designed for low-temperature experiments. FT-IR spectra in solid form were recorded on Bruker-Alpha Eco-ATR FTIR spectrometer using the standard KBr disk method. <sup>1</sup>H-NMR spectra were measured with a Bruker model Ascend 400 FT-NMR spectrometer. Electrospray ionization mass spectra (ESI-MS) were recorded on an Agilent Mass Spectrometer (6200 series TOF/6500 series Q-TOF B.08.00) by infusing samples directly into the source using a manual method. The spray voltage was set at 4.2 kV and the capillary temperature at 80 °C. GC-MS analyses were recorded on an Agilent 7890B GC system equipped with a 5977B MSD Mass analyser. Single crystal X-ray diffraction data were collected using Bruker D8 Venture super Duo diffractometer with Photon-III detector using Mo source ( $\lambda = 0.71073 \text{ \AA}$ ) and on SuperNova (Mo) X-ray diffractometer. EPR spectral data were collected using an X-band JEOL Model JES FA200 instrument at liquid nitrogen temperature.

**Synthesis of [(12TMC)Fe<sup>II</sup>(CH<sub>3</sub>CN)](OTf)<sub>2</sub> (1).** CH<sub>3</sub>CN solution (2 mL) of Fe<sup>II</sup>-triflate (480 mg, 1.1 mmol) was added to 12TMC (229 mg, 1 mmol) with constant stirring for 12 hours at room temperature under an Ar atmosphere (we usually prefer to synthesize in the Glove box) as reported elsewhere.<sup>S3</sup> The solution's color changed to pale yellow after reaction completion. The reaction mixture was dried under a vacuum, and the dried product was dissolved in DCM. Diethyl ether (50 mL) was added to precipitate **1** (white solid). The precipitate was collected and dried under a vacuum over anhydrous CaCl<sub>2</sub>. Yield: 525 mg (~ 85 %). UV:  $\lambda_{\text{max}} = 333 \text{ nm}$  ( $\epsilon = 60 \text{ M}^{-1} \text{ cm}^{-1}$ ).

**Synthesis of [(12TMC)Fe<sup>II</sup>(NO<sub>2</sub>)](OTf) (2):** To a 5 ml CH<sub>3</sub>CN solution of [(12TMC)Fe<sup>II</sup>(CH<sub>3</sub>CN)](OTf)<sub>2</sub> (623 mg, 1 mmol), 1 mL solution of NaNO<sub>2</sub> (69 mg, 1 mmol) with 15-crown-5 (2.5 equivalent) in CH<sub>3</sub>CN was added slowly with constant stirring under Ar atmosphere. The mixture was stirred for one hour at RT (298 K) until the color of the solution changed from colorless to deep yellow, indicating the completion of the reaction. The solvent

was removed under vacuum, and the residue was dissolved in DCM and then layered with diethyl ether and kept for crystallization at - 20 °C. Yield: 430 mg (~ 90%). UV:  $\lambda_{\max} = 325$  nm ( $\epsilon = 356 \text{ M}^{-1} \text{ cm}^{-1}$ ). FT-IR (KBr pellet): 2940, 1270, 1015, 757  $\text{cm}^{-1}$ . Mass ( $m/z$ ): Calcd: 330.1, Found: 330.1.  $[(12\text{TMC})\text{Fe}^{\text{II}}(^{15}\text{NO}_2^-)](\text{OTf})$  ( $2\text{-}^{15}\text{NO}_2^-$ ) was prepared by using the same method with  $\text{Na}^{15}\text{NO}_2$ . FT-IR (KBr pellet): 2940, 1247, 1015, 757  $\text{cm}^{-1}$ . Mass ( $m/z$ ): Calcd: 331.1, Found: 331.1.

**Synthesis of Iron-nitrosyl species ( $\{\text{FeNO}\}^7$ , **3**) (Reaction of **2** +  $\text{H}^+$ ).** Complex **3** was generated in the reaction of  $\text{H}^+$ -ion as per the following details, explained next. The synthesis of **3** can be done either using the Glove box /or using the schlenk line under Ar conditions. Upon addition of one-equiv. /or two-equiv.  $\text{H}^+$  to the Ar saturated  $\text{CH}_3\text{CN}$  solution (10 mL) of  $[(12\text{TMC})\text{Fe}^{\text{II}}(\text{CH}_3\text{CN})](\text{OTf})_2$  (0.480 g, 1 mmol), it showed a visual color change from deep-yellow to green. We then kept the reaction mixture for 15 minutes, and the solution was layered with Ar-saturated ether, and the solution was kept at 233 K to obtain complex **3** as crystals/solid. After two days, we obtained deep green colored crystals of  $[(12\text{TMC})\text{Fe}^{\text{II}}(\text{NO})](\text{OTf})_2$ , which was confirmed with different spectral parameters. We performed the same reactions several times to determine crude yields, and the average yield of **3** was confirmed to be 80 ( $\pm 4$ ) %. We also determined the single-crystal structure of complex **3**, which showed an axially coordinated end-on NO moiety with a Co-N-O bond angle of 168.65 Å, suggesting a radical behavior of NO moiety. UV:  $\lambda_{\max} = 350$  nm ( $\epsilon = 1450 \text{ M}^{-1} \text{ cm}^{-1}$ ) at 233 K in  $\text{CH}_3\text{CN}$ . FT-IR (KBr pellet): 2940, 1783  $\text{cm}^{-1}$ . Mass ( $m/z$ ): Calcd: 464.1, Found: 464.1 ( $[(12\text{TMC})\text{Fe}^{\text{II}}(\text{NO})(\text{OTf})]^+$ ).

**Synthesis of  $\{\text{FeNO}\}^7$  (Reaction of **1** + NO gas).** To compare the spectroscopic data of  $\{\text{FeNO}\}^7$  (**3**) generated in the reaction of **2** +  $\text{H}^+$  (triflic acid), we have prepared an authentic  $\{\text{FeNO}\}^7$  by reacting **1** with  $\text{NO}_{(\text{g})}$  directly. The details are explained next. We have reacted  $[(12\text{TMC})\text{Fe}^{\text{II}}(\text{CH}_3\text{CN})](\text{OTf})_2$  (0.623 g, 1 mmol) in Ar-saturated  $\text{CH}_3\text{CN}$  (10 mL) with an excess of  $\text{NO}_{(\text{g})}$  for 5 min, and the color of the solution was changed from colorless to green color. The reaction mixture was kept for 30 min, and excess  $\text{NO}_{(\text{g})}$  was removed by purging Ar gas (degassing) at 233 K, and then we layered it with Ar-saturated ether. Deep green colored crystals  $[(12\text{TMC})\text{Fe}(\text{NO})](\text{OTf})_2$  were obtained by slow diffusion after several days at 233 K. UV:  $\lambda_{\max} = 350$  nm ( $\epsilon = 1450 \text{ M}^{-1} \text{ cm}^{-1}$ ) at 233 K in  $\text{CH}_3\text{CN}$ . FT-IR (KBr pellet): 2940, 1783  $\text{cm}^{-1}$ . Mass ( $m/z$ ): Calcd: 464.1, Found: 464.1 ( $[(12\text{TMC})\text{Fe}^{\text{II}}(\text{NO})(\text{OTf})]^+$ ).

**Reactivity Studies:** We follow multiple spectral measurements to avoid discrepancies in the spectroscopic data. Hence, all UV-vis spectral measurements were run in a UV cuvette in

CH<sub>3</sub>CN at specific temperatures. All kinetic reactions were run at least three times, and the data reported here are the average outcome for these reactions. We have performed all the reactions using CH<sub>3</sub>CN as solvent at room temp (298 K) as well as 233 K. The formation of **3** with H<sub>2</sub>O<sub>2</sub> /or H<sub>2</sub>O in the reactions was identified by comparing with authentic samples, and product yields were calculated by comparing with standard curves prepared with original samples. In addition, NMR measurements were performed under the Ar atmosphere at specific temperatures to follow the formation of H<sub>2</sub>O /H<sub>2</sub>O<sub>2</sub> and also the confirmation of magnetic moments of metal centers using Evans' method.

**<sup>14/15</sup>N-labeling Experiments by FT-IR Spectroscopy (Reduction of NO<sub>2</sub><sup>-</sup> to NO):** To follow the change in the functional groups (NO<sub>2</sub><sup>-</sup> to NO) coordinated to Fe-center and labeling N-atom, we have recorded the FT-IR spectra of the different complexes in their solid form as KBr pellets. The FT-IR spectra of **2** showed a nitrite (<sup>14</sup>NO<sub>2</sub><sup>-</sup>) characteristic peak at 1270 cm<sup>-1</sup>, which shifted to 1247 cm<sup>-1</sup> when prepared with <sup>15</sup>N-labeled nitrite (<sup>15</sup>NO<sub>2</sub><sup>-</sup>). The change in the IR stretching frequency of Fe-bound NO<sub>2</sub><sup>-</sup> ( $\Delta = 23 \text{ cm}^{-1}$ ) confirmed that an increase in the reduced mass of nitrogen atom (<sup>14</sup>N to <sup>15</sup>N) is responsible for the decrease in the stretching frequency of the NO<sub>2</sub><sup>-</sup> functional group. We observed similar spectral changes when the IR spectra of **3** were recorded with <sup>14</sup>N and <sup>15</sup>N-labeled atoms. The FT-IR spectra of **3** showed a characteristic nitrosyl stretching frequency at 1783 cm<sup>-1</sup> (<sup>14</sup>N), which shifted to 1755 cm<sup>-1</sup> (<sup>15</sup>N,  $\Delta = 28 \text{ cm}^{-1}$ ) when exchanged with the <sup>15</sup>N-labeled nitrosyl functional group.

**<sup>14/15</sup>N-labeling Experiments by ESI-Mass Spectrometry (Reduction of NO<sub>2</sub><sup>-</sup> to NO):** In addition to the FT-IR spectral measurements, we have performed the ESI-MS spectral measurements to establish the N-atom source for **3** and **2**. The ESI-MS spectra for **2**-<sup>14</sup>NO<sub>2</sub><sup>-</sup> and **2**-<sup>15</sup>NO<sub>2</sub><sup>-</sup> showed scientific agreement with the labeled N-atom by showing an increase in the mass value for Fe<sup>II</sup>-NO<sub>2</sub><sup>-</sup> complexes ( $[(12\text{TMC})\text{Fe}(\text{NO}_2^-)]^+$  (calc. *m/z* 330.1) and  $[(12\text{TMC})\text{Fe}(\text{}^{15}\text{NO}_2^-)]^+$  (calc. *m/z* 331.1), respectively). We observed similar mass changes for **3** formed in the reaction of **2** with H<sup>+</sup>. The ESI-MS spectrum of **3** showed a prominent peak at *m/z* 463.1,  $[(12\text{TMC})\text{Fe}(\text{NO})(\text{OTf})]^+$  (calc. *m/z* 463.1), and shifted to 464.1,  $[(12\text{TMC})\text{Fe}(\text{}^{15}\text{NO})(\text{OTf})]^+$  (calc. *m/z* 464.1), confirming the change of functional groups.

**Magnetic moment calculation and determination of the spin-state of Fe-center in complexes **2** & **3**:** Evans' method of <sup>1</sup>H-NMR was performed to determine the spin state (number of unpaired electrons) of Fe-center in **2** and **3** at 298 K. A WILMAD® coaxial insert (with a sealed capillary) tubes containing only CD<sub>3</sub>CN solvent (with 1.0% TMS) were inserted into the standard NMR tubes containing the **2** and **3** (4.0 mM, with 0.1% TMS), respectively.

We have calculated the chemical shift values of the TMS peak in the presence of **2** and/or **3** with respect to that of the TMS peak in the outer NMR tube. The magnetic moments for both complexes were calculated using the given equation.<sup>S4</sup>

| <b>2</b>                                                  | <b>3</b>                                                  |
|-----------------------------------------------------------|-----------------------------------------------------------|
| $\mu_{eff} = 0.0618(\Delta\nu T / 2fM)^{1/2}$             | $\mu_{eff} = 0.0618(\Delta\nu T / 2fM)^{1/2}$             |
| $\mu_{eff} = 0.0618 * (76 * 298 / 2 * 400 * 0.004)^{1/2}$ | $\mu_{eff} = 0.0618 * (16 * 298 / 2 * 400 * 0.004)^{1/2}$ |
| <b><math>\mu_{eff} = 5.19</math> BM</b>                   | <b><math>\mu_{eff} = 2.3</math> BM</b>                    |

Where f = oscillator frequency (MHz) of the superconducting spectrometer, T = absolute temperature, M = molar concentration of the **2** and **3**, and  $\nu$  = difference in frequency (Hz) between the two TMS signals.

The calculated magnetic moments for **2** and **3** were determined to be 5.19 BM and 2.3 BM in CD<sub>3</sub>CN at RT, respectively. These magnetic moment values suggest the presence of 4 unpaired electrons in the Fe<sup>2+</sup> center of **2** (S = 2). While the presence of one unpaired electron in **3** (S = 1/2).

**Calculation of Binding Constant ( $K_b$ ):** The binding constant values  $K_b(\text{Fe}^{\text{II}}\text{-NO}_2^-)$  &  $K_b(\{\text{FeNO}\})^7$  were determined by titrating the **1** to the different concentrations of NO<sub>2</sub><sup>-</sup> & NO, respectively. The stock solutions of **1** (0.5 mM) were prepared in CH<sub>3</sub>CN, and the reacting species/guest molecules were prepared in the required solvents in 5.0 mM (NaNO<sub>2</sub>/crown ether in CH<sub>3</sub>CN) & 14 mM (NO<sub>(g)</sub> in CH<sub>3</sub>CN), respectively. Solutions of **1** with increasing concentration of the reacting species were prepared separately. These solutions' UV-vis spectra were recorded to get absorbance values as specific  $\lambda_{max}$  values. The binding constants were then calculated using the Benesi-Hildebrand equation. Binding constant values were determined from the equation given below.<sup>S5</sup>

$$1/(A-A_0) = 1/\{K_b(A_{max}-A_0) [X]_n\} + 1/[A_{max}-A_0]$$

Here, A<sub>0</sub> is the absorbance of **1** in the absence of guests, A is the absorbance in the presence of guests at different concentrations, and A<sub>max</sub> is the absorbance in the presence of added [X]<sub>max</sub> where X was NO<sub>2</sub><sup>-</sup> /or NO, respectively, and  $K_b$  is the binding constant (M<sup>-1</sup>). The binding constants ( $K_b$ ) were determined from the slope of the straight line of the plot of 1/(A-A<sub>0</sub>) against 1/(A<sub>max</sub>-A<sub>0</sub>)[X]<sub>n</sub>. The binding constants ( $K_b$ ) as determined by the UV-vis titration method for **2**,  $K_b(\text{Fe}^{\text{II}}\text{-NO}_2^-)$ , & **3**,  $K_b(\{\text{FeNO}\})^7$  with X are found to be  $4.7 \times 10^2 \text{ M}^{-1}$  &  $8.4 \times 10^2 \text{ M}^{-1}$  for NO<sub>2</sub><sup>-</sup> and NO, respectively.

**Qualitative and quantitative analysis of H<sub>2</sub>O<sub>2</sub> by <sup>1</sup>H-NMR.** To confirm and calculate the amount of the H<sub>2</sub>O<sub>2</sub> formed upon reacting **2** with one-equiv. CF<sub>3</sub>SO<sub>3</sub>H, we have monitored the reaction by <sup>1</sup>H-NMR spectroscopy. In this regard, the <sup>1</sup>H-NMR spectrum of **2** (2.4 mg / 500 μL, 10 mM) with one-equiv. CF<sub>3</sub>SO<sub>3</sub>H in CD<sub>3</sub>CN showed a signal at 8.66 ppm, corresponding to H<sub>2</sub>O<sub>2</sub>. We compared the <sup>1</sup>H-NMR spectrum of the H<sub>2</sub>O<sub>2</sub> formed in the above reaction with the authentic samples, H<sub>2</sub>O<sub>2</sub> only and H<sub>2</sub>O<sub>2</sub> plus **3**, which established the formation of H<sub>2</sub>O<sub>2</sub>. Additionally, we have calculated the amount of H<sub>2</sub>O<sub>2</sub> formed in the above reaction by comparing the peak-integral, corresponding to H<sub>2</sub>O<sub>2</sub> (8.66 ppm) of the reaction mixture (**2** + CF<sub>3</sub>SO<sub>3</sub>H) with the authentic sample (5 mM H<sub>2</sub>O<sub>2</sub> + **3**) containing an internal standard Benzene (5 mM). We have calculated the yield of H<sub>2</sub>O<sub>2</sub>, following the internal-standard method, in three different experiments to have an average value found to be 54.4 % (defining ½ equivalent of H<sub>2</sub>O<sub>2</sub> relative to **2** as 100% yield). These calculations suggest that the lower yield of evolved H<sub>2</sub>O<sub>2</sub> is due to its decomposition with time to other species.

| S. No. | Reaction System                                    | Integral of benzene peak (7.37 ppm)<br>(A) | Integral of H <sub>2</sub> O <sub>2</sub> peak (8.6 ppm)<br>(B) | Ratio<br>(B)/(A) |
|--------|----------------------------------------------------|--------------------------------------------|-----------------------------------------------------------------|------------------|
| (a)    | <b>3</b> +<br>H <sub>2</sub> O <sub>2</sub> (5 mM) | 6                                          | 2                                                               | 0.33             |
| (b)    | <b>2</b> +<br>1.1 equiv. H <sup>+</sup>            | 6                                          | 1.1                                                             | 0.183            |
| (c)    | <b>2</b> +<br>1.1 equiv. H <sup>+</sup>            | 6                                          | 1.15                                                            | 0.191            |
| (d)    | <b>2</b> +<br>1.1 equiv. H <sup>+</sup>            | 6                                          | 1.0                                                             | 0.166            |

**Amount of H<sub>2</sub>O<sub>2</sub> formed:**

$$\text{Sample 1} = (0.183 / 0.33) \times 5 \text{ mM} = 2.77 \text{ mM (55.4 \%)}$$

Sample 2 =  $(0.191 / 0.33) \times 5 \text{ mM} = 2.89 \text{ mM}$  (57.8 %)

Sample 3 =  $(0.166 / 0.33) \times 5 \text{ mM} = 2.51 \text{ mM}$  (50.2 %)

**H<sub>2</sub>O<sub>2</sub> formed in the reaction (average): = ~ 54.4 %**

**Estimation of H<sub>2</sub>O<sub>2</sub> (Iodometric-titration):** Additionally, the amount of H<sub>2</sub>O<sub>2</sub> formed in the reaction of **2** with one-equiv. of H<sup>+</sup> was also calculated using iodometric titration. First, H<sub>2</sub>O<sub>2</sub> was generated in the reaction of **2** (0.1 mM) with one-equiv. of H<sup>+</sup> (0.1 mM) in 2.5 mL CH<sub>3</sub>CN under an Ar atmosphere at room temperature. The reaction solution was treated with an excess of sodium iodide (0.15 mM) under an Ar atmosphere, and the UV-vis spectrum was recorded for the reaction. As explained below, the quantity of I<sub>3</sub><sup>-</sup> formed in the reaction was determined by finding an absorbance value at 361 nm as a result of I<sub>3</sub><sup>-</sup> ( $\lambda_{max} = 361 \text{ nm}$ ,  $\epsilon = 2.8 \times 10^4 \text{ M}^{-1} \text{ cm}^{-1}$ ).

**Amount of H<sub>2</sub>O<sub>2</sub> formed:**

Sample 1 = (Abs. = 0.99) = 0.0353 mM (~ 70 % of H<sub>2</sub>O<sub>2</sub>)

Sample 2 = (Abs. = 0.95) = 0.0339 mM (~ 67.8 % of H<sub>2</sub>O<sub>2</sub>)

Sample 3 = (Abs. = 0.9) = 0.0321 mM (~ 64 % of H<sub>2</sub>O<sub>2</sub>)

**H<sub>2</sub>O<sub>2</sub> formed in the reaction (average): = ~ 67 % (defining 1/2 equivalent of H<sub>2</sub>O<sub>2</sub> relative to **2** as 100% yield).**

Also, we have determined the generation of H<sub>2</sub>O<sub>2</sub> in the reaction of **2** (0.1mM) with two-equiv. H<sup>+</sup> (0.2 mM) under similar conditions. The reaction solution was treated with an excess of sodium iodide (0.15 mM) in 2.5 ml CH<sub>3</sub>CN under an Ar atmosphere. The UV-vis spectrum was recorded for the reaction. H<sub>2</sub>O<sub>2</sub> formed in the reaction was found in negligible amounts.

**Detection of [Fe-ONOH]<sup>2+</sup> intermediate (•OH radical trapping experiment):** We performed the •OH radical trapping experiment using 2,4-di-*tert*-butyl-phenol (2,4-DTBP) to confirm the formation of •OH radical from the N-O bond homolysis. For this reaction, we have reacted **2** (1.0 mM) with 2,4-DTBP (2.5 mM) in the presence of one-equiv. H<sup>+</sup> in CH<sub>3</sub>CN at 293 K under Ar atmosphere. Then the qualitative and quantitative analysis of the reaction mixture was performed using GC-MS and HPLC, respectively. To quantify the different products forming in the reaction mixture, we used the standard plots of all the compounds in HPLC. In this experiment, we observed the formation of 3,5-Di-*tert*-butylcatechol (3,5-DTBC) with small amounts of 2,4-DTBP-dimer (3,5-DTBP-D) and nitro-2,4-DTBP (nitro-3,5-DTBP), suggesting the N-O bond homolysis to form free •OH radical and hence indirectly proving the presence of [Fe-ONOH]<sup>2+</sup> intermediate (**3**). The amount of 3,5-DTBC formed in the reaction



was found to be ~ 22 % (0.22 mM), accounting for 44 % •OH radical, 2,4-DTBP-D (~ 8 %, 0.04 mM, 16 % •OH radical), and nitro-2,4-DTBP (~ 6 %, 0.0198 mM, 18 % •OH radical) in the reaction mixture, because some amount of •OH decomposes to other side products due to its high reactivity. To confirm the source of •OH, we have performed a similar reaction using CF<sub>3</sub>SO<sub>3</sub>D instead of CF<sub>3</sub>SO<sub>3</sub>H. Here, we have observed the formation of 3,5-DTBC-D, confirming the source of •OH is [Fe-ONOH]<sup>2+</sup> intermediate. In addition, we generate [Fe-<sup>16</sup>O<sup>14</sup>N<sup>18</sup>OH]<sup>2+</sup> intermediate species in the reaction of **2**-<sup>16</sup>O<sup>14</sup>N<sup>18</sup>O<sup>-</sup> + H<sup>+</sup> and trap it using the 2,4-DTBP test. In the reaction mixture, we observed the formation of 3,5-DTBC(<sup>18</sup>OH), with the formation of <sup>16</sup>O<sup>14</sup>N<sup>18</sup>O-DTBP.

**Monitoring reaction of **2** with H<sup>+</sup> using EPR spectroscopy:** We followed the reaction of **2** with H<sup>+</sup> at different time intervals with EPR spectroscopic measurements. In this regard, an EPR tube equipped with 500 μl CH<sub>3</sub>CN solution of **2** (4 mM) was prepared inside the glovebox and sealed with a rubber septum. The EPR tube was further cooled to 233 K, and an Ar-saturated solution of H<sup>+</sup> (two-equiv.) was added to the EPR tube using a gas-tight hamilton syringe, and the EPR spectrum was recorded at 77 K. After that, the tube was warmed to 233 K and re-recorded the spectrum at 77 K. This process continued until the reaction was completed to follow the reaction progress. Separately, we recorded an authentic sample of **3**. The EPR spectrum of isolated **3** (4 mM) in CH<sub>3</sub>CN was recorded at 77 K under Ar.

**Bond valance sum calculation.** For more clearly in the oxidation state of **3**. We calculated the oxidation state of the Fe-center using the bond valance sum method using crystal parameters.  $z_j$  is the oxidation state of the metal center,  $S_{ij}$  is the bond valance for the bond between the  $i$  and  $j$  atom,  $R_o$  is constant  $R$  is the bond length between  $i$  and  $j$  atom, and  $B$  is constant for all bonds 0.37.<sup>S6</sup>

$$z_j = \sum S_{ij}$$

$$(S_{ij}) \text{ bond valence} = \exp((R_o - R)/B)$$

For BVS calculations, **3** was treated as Fe<sup>2+</sup> as well as Fe<sup>3+</sup>. Calculations suggest that when Fe is treated as Fe<sup>2+</sup>, calculation showed it to have 1.846, while when it was treated as Fe<sup>3+</sup>, it showed a 2.63 oxidation state. BVS calculations also support iron oxidation state as Fe<sup>2+</sup>.

**Nitric Oxide Preparation and Purification.** Nitric oxide (NO) was prepared and purified by following a detailed procedure, as shown in Figure S21. First, NO gas was prepared by the reaction of NaNO<sub>2</sub> with H<sub>2</sub>SO<sub>4</sub> under an Ar atmosphere and then passed through two different types of columns. First, it passes through a column filled with NaOH beads to remove higher nitrogen oxide impurities. After that, the NO passes through a set of two columns filled with

NaOH beads molecular sieves to remove the minor amount of remaining higher nitrogen oxides and moisture impurities. The highly purified NO<sub>(g)</sub> was then collected in a vacuum Schlenk flask fitted with a rubber septum (free from oxygen; after several cycles of vacuum and Ar purging). High pressure NO<sub>(g)</sub> (with pressure >1 atmosphere; the septum bulges outward due to high pressures) then passes through an Ar-saturated (oxygen-free) and dry Acetonitrile (CH<sub>3</sub>CN) solution for 15 minutes. The concentration of NO in the NO-saturated CH<sub>3</sub>CN solution is ~14 mM.<sup>S7</sup>

**Single-Crystal XRD Studies.** Single crystals suitable for diffraction studies were mounted on Hampton cryo-loops. All geometric and intensity data for the crystals were collected using a Super-Nova (Mo) X-ray diffractometer equipped with a micro-focus sealed X-ray tube Mo-K $\alpha$  ( $\lambda$  = 0.71073 Å) X-ray source and HyPix3000 detector with increasing  $\omega$  (width of 0.3 per frame) at a scan speed of either 5 or 10 s/frame. The CrysAlisPro software was used for data acquisition and data extraction. Using Olex2<sup>S8</sup>, the structure was solved with the SIR2004<sup>S9</sup> structure solution program using Direct Methods and refined with the ShelXL<sup>S10</sup> refinement package using Least Squares minimization. All non-hydrogen atoms were refined with anisotropic thermal parameters. There are two molecules per asymmetric unit, and one of the N-tetramethylated cyclam (TMC) ligand's ring is found to be highly disordered. Detailed crystallographic data and structural refinement parameters are summarized in Table T1 and T2. CCDC2181978 and CCDC2181979 contain supplementary crystallographic data. These data can be obtained free of charge from The Cambridge Crystallographic Data Centre.

## References

- S1. W. L. Armarego, *purification of laboratory chemicals*, Butterworth-Heinemann, **2017**.
- S2. J. A. Halfen, V. G. Young, Jr., *Chem. Commun.*, **2003**, 2894-2895.
- S3. Cho, J.; Jeon, S.; Wilson, S. A.; Liu, L. V.; Kang, E. A.; Braymer, J. J.; Lim, M. H.; Hedman, B.; Hodgson, K. O.; Valentine, J. S.; Solomon, E. I.; Nam, W., Structure and reactivity of a mononuclear non-haem iron(III)-peroxo complex. *Nature* **2011**, *478*, 502-5.
- S4. Evans, D. F., 400. The determination of the paramagnetic susceptibility of substances in solution by nuclear magnetic resonance. *J. Chem. Soc.* **1959**, 2003-2005.
- S5. Goswami, S.; Sen, D.; Das, N. K.; Fun, H. K.; Quah, C. K., A new rhodamine based colorimetric 'off-on' fluorescence sensor selective for Pd<sup>2+</sup> along with the first bound X-ray crystal structure. *Chem Commun (Camb)* **2011**, *47*, 9101-3
- S6. W. Liu and H. H. Thorp, *Inorg. Chem.*, **1993**, *32*, 4102-4105.
- S7. Young, C. L. Solubility Data Series Val. 8 Oxides of Nitrogen, International Union of Pure and Applied Chemistry (IUPAC), **1981**.
- S8. Dolomanov, O. V.; Bourhis, L. J.; Gildea, R. J.; Howard, J. A. K.; Puschmann, H., OLEX2: a complete structure solution, refinement and analysis program. *J Appl Crystallogr* **2009**, *42*, 339-341
- S9. Burla, M. C.; Caliandro, R.; Camalli, M.; Carrozzini, B.; Cascarano, G. L.; De Caro, L.; Giacovazzo, C.; Polidori, G.; Siliqi, D.; Spagna, R., IL MILIONE: a suite of computer programs for crystal structure solution of proteins. *J Appl Crystallogr* **2007**, *40*, 609-613
- S10. Sheldrick, G. M., Crystal structure refinement with SHELXL. *Acta Crystallogr C Struct Chem* **2015**, *71*, 3-8

**Table T1** Crystallographic data for **2** and **3**.

|                                                     | <b>2</b>                                                                         | <b>3</b>                                                                                      |
|-----------------------------------------------------|----------------------------------------------------------------------------------|-----------------------------------------------------------------------------------------------|
| Chemical formula                                    | C <sub>13</sub> H <sub>28</sub> F <sub>3</sub> FeN <sub>5</sub> O <sub>5</sub> S | C <sub>16</sub> H <sub>31</sub> F <sub>6</sub> FeN <sub>6</sub> O <sub>7</sub> S <sub>2</sub> |
| Formula weight                                      | 479.31                                                                           | 653.44                                                                                        |
| Wavelength /Å                                       | 0.71073                                                                          | 0.71073                                                                                       |
| Crystal system                                      | monoclinic                                                                       | monoclinic                                                                                    |
| Space group                                         | P2 <sub>1</sub> /c                                                               | P2 <sub>1</sub> /c                                                                            |
| <i>T</i> , K                                        | 293(2)                                                                           | 293(2)                                                                                        |
| <i>a</i> , Å                                        | 16.1966(5)                                                                       | 11.791(2)                                                                                     |
| <i>b</i> , Å                                        | 16.5801(5)                                                                       | 14.711(3)                                                                                     |
| <i>c</i> , Å                                        | 16.2444(5)                                                                       | 15.692(3)                                                                                     |
| $\alpha$ , °                                        | 90                                                                               | 90                                                                                            |
| $\beta$ , °                                         | 100.654(3)                                                                       | 104.111(5)                                                                                    |
| $\gamma$ , °                                        | 90                                                                               | 90                                                                                            |
| <i>V</i> / Å <sup>3</sup>                           | 4287.1(2)                                                                        | 2639.7(9)                                                                                     |
| <i>Z</i>                                            | 8                                                                                | 4                                                                                             |
| Calculated density, g/cm <sup>3</sup>               | 1.485                                                                            | 1.644                                                                                         |
| Abs. Coeff. /mm <sup>-1</sup>                       | 0.859                                                                            | 0.820                                                                                         |
| Reflections collected                               | 37140                                                                            | 46121                                                                                         |
| Unique reflections                                  | 8656                                                                             | 4519                                                                                          |
| Refinement method                                   | Least-squares on <i>F</i> <sup>2</sup>                                           | Least-squares on <i>F</i> <sup>2</sup>                                                        |
| Data/restraints/parameters                          | 8656/0/549                                                                       | 4519/0/348                                                                                    |
| Goodness-of-fit on <i>F</i> <sup>2</sup>            | 1.110                                                                            | 1.196                                                                                         |
| Final <i>R</i> indices [ <i>I</i> > 2σ( <i>I</i> )] | <i>R</i> <sub>1</sub> = 0.0689<br>w <i>R</i> <sub>2</sub> = 0.2301               | <i>R</i> <sub>1</sub> = 0.0756,<br>w <i>R</i> <sub>2</sub> = 0.1800                           |
| <i>R</i> indices (all data)                         | <i>R</i> <sub>1</sub> = 0.1046<br>w <i>R</i> <sub>2</sub> = 0.2304               | <i>R</i> <sub>1</sub> = 0.1150,<br>w <i>R</i> <sub>2</sub> = 0.2012                           |

**Table T2** Selected bond lengths (Å) and bond angles (°) for **2** and **3**.

| <b>2</b>  |            | <b>3</b>  |          |
|-----------|------------|-----------|----------|
| Fe1 O1    | 2.175(4)   | Fe1 N1    | 1.999(7) |
| Fe1 O2    | 2.182(4)   | Fe1 N2    | 2.031(6) |
| Fe1 N1    | 2.203(4)   | Fe1 N3    | 2.023(6) |
| Fe1 N2    | 2.200(4)   | Fe1 N4    | 2.031(6) |
| Fe1 N3    | 2.222(3)   | Fe1 N5    | 1.692(6) |
| Fe1 N4    | 2.209(4)   |           |          |
| O1 Fe1 O2 | 51.7(2)    | N1 Fe1 N2 | 86.3(3)  |
| O1 Fe1 N1 | 129.2(2)   | N1 Fe1 N3 | 148.9(3) |
| O1 Fe1 N2 | 94.2(2)    | N1 Fe1 N4 | 85.7(2)  |
| O1 Fe1 N3 | 95.3(2)    | N2 Fe1 N4 | 146.7(2) |
| O1 Fe1 N4 | 132.3(2)   | N3 Fe1 N2 | 84.8(3)  |
| O2 Fe1 N3 | 129.1(2)   | N3 Fe1 N4 | 85.5(3)  |
| N1 Fe1 O2 | 95.9(2)    | N5 Fe1 N1 | 102.7(3) |
| N1 Fe1 N3 | 131.18(15) | N5 Fe1 N2 | 105.8(3) |
| N2 Fe1 O2 | 131.3(2)   | N5 Fe1 N3 | 108.4(3) |
| N2 Fe1 N1 | 79.69(16)  | N5 Fe1 N4 | 107.5(3) |
| N2 Fe1 N3 | 80.67(15)  | O1 N5 Fe1 | 168.6(6) |
| N4 Fe1 O2 | 95.7(2)    |           |          |
| N4 Fe1 N1 | 81.27(18)  |           |          |
| N4 Fe1 N2 | 130.54(16) |           |          |
| N5 O1 Fe1 | 99.5(4)    |           |          |

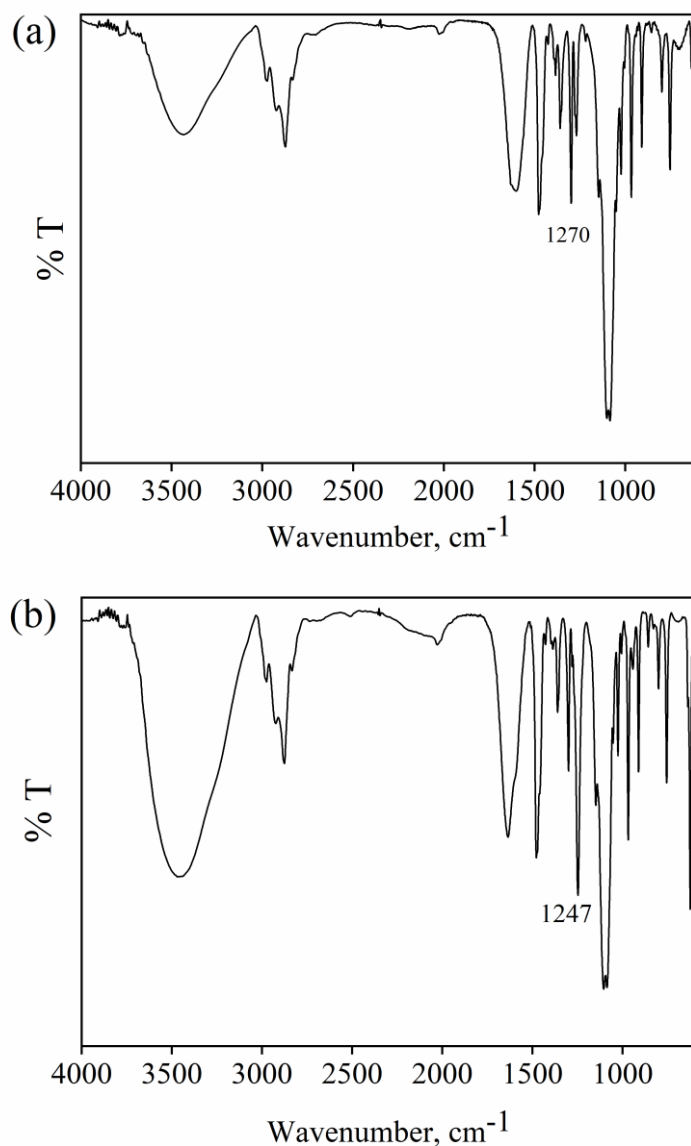

**Figure S1.** FT-IR spectrum of (a) **2** (with Fe<sup>II</sup> bound <sup>14</sup>NO<sub>2</sub><sup>-</sup>) was recorded in the KBr pellet at 298 K. The spectrum showed the peaks for the aliphatic chain (at 2940 cm<sup>-1</sup>) and Fe<sup>II</sup>-bound <sup>14</sup>NO<sub>2</sub><sup>-</sup> group (at 1270 cm<sup>-1</sup>). (b) **2** (with Fe<sup>II</sup> bound <sup>15</sup>NO<sub>2</sub><sup>-</sup>) recorded in KBr pellet at 298 K. The spectrum showed a peak Fe<sup>II</sup>-bound <sup>15</sup>NO<sub>2</sub><sup>-</sup> group (at 1247 cm<sup>-1</sup>).

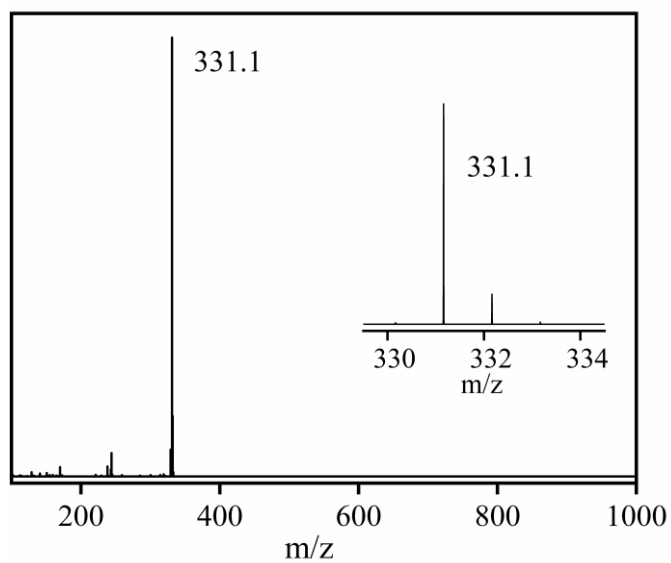

**Figure S2.** ESI-MS spectrum of **2** (with Fe<sup>II</sup> bound <sup>15</sup>NO<sub>2</sub><sup>-</sup>). The peak at *m/z* 331.1 is assigned to be [(12TMC)Fe<sup>II</sup>(<sup>15</sup>NO<sub>2</sub>)]<sup>+</sup>, confirming a Fe<sup>II</sup> bound <sup>15</sup>NO<sub>2</sub><sup>-</sup> anion.

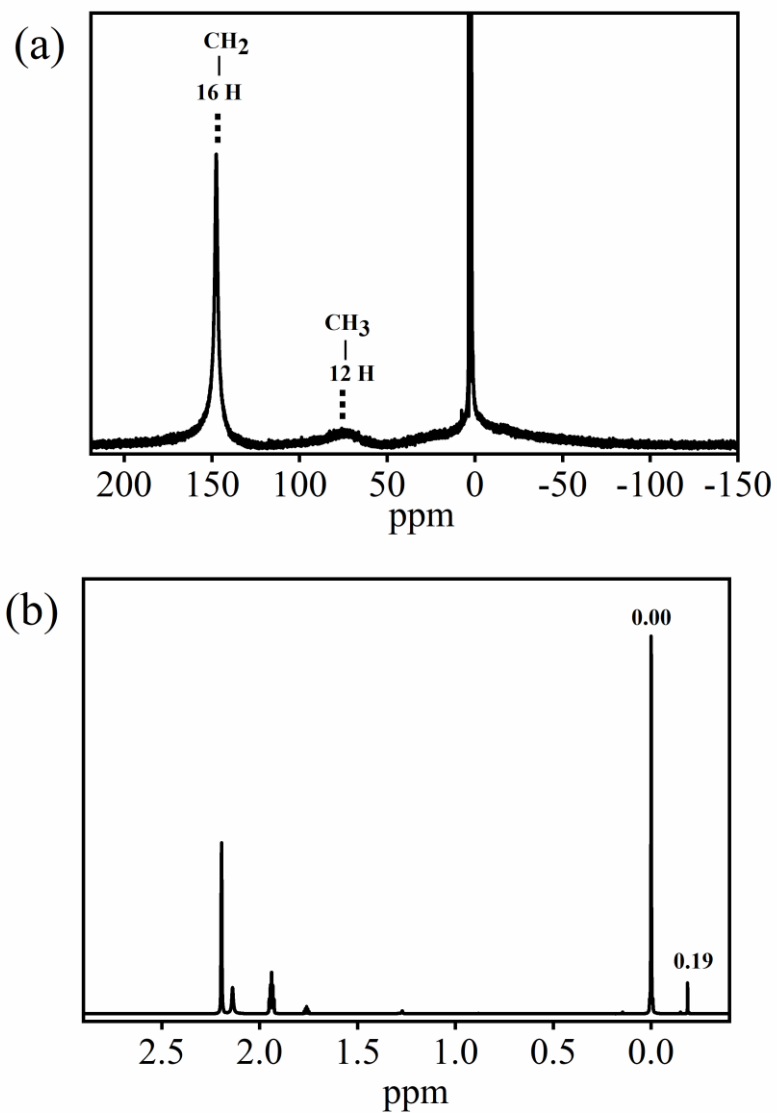

**Figure S3.** (a) Long-range <sup>1</sup>H-NMR (400 MHz) spectra of **2** (10 mM) in CD<sub>3</sub>CN. (b) <sup>1</sup>H-NMR (400 MHz) spectrum of **2** (4 mM) in CD<sub>3</sub>CN (0.1 % TMS), recorded in a coaxial NMR tube, with CD<sub>3</sub>CN (1.0 % TMS) inside at RT.



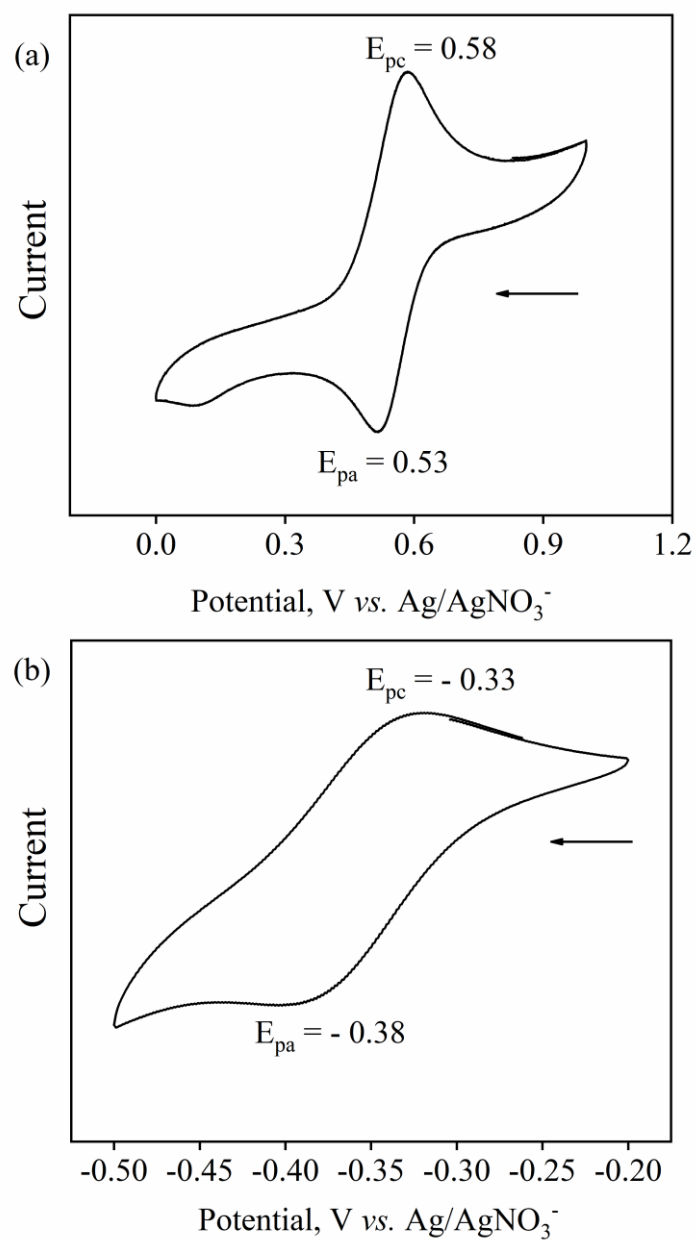

**Figure S4.** Cyclic voltammogram of (a) **2** (1 mM) and (b) **3** (1 mM) in CH<sub>3</sub>CN containing n-Bu<sub>4</sub>NPF<sub>6</sub> (0.25 M) as a supporting electrolyte (scan rate = 0.1 V/s) at 298 K.

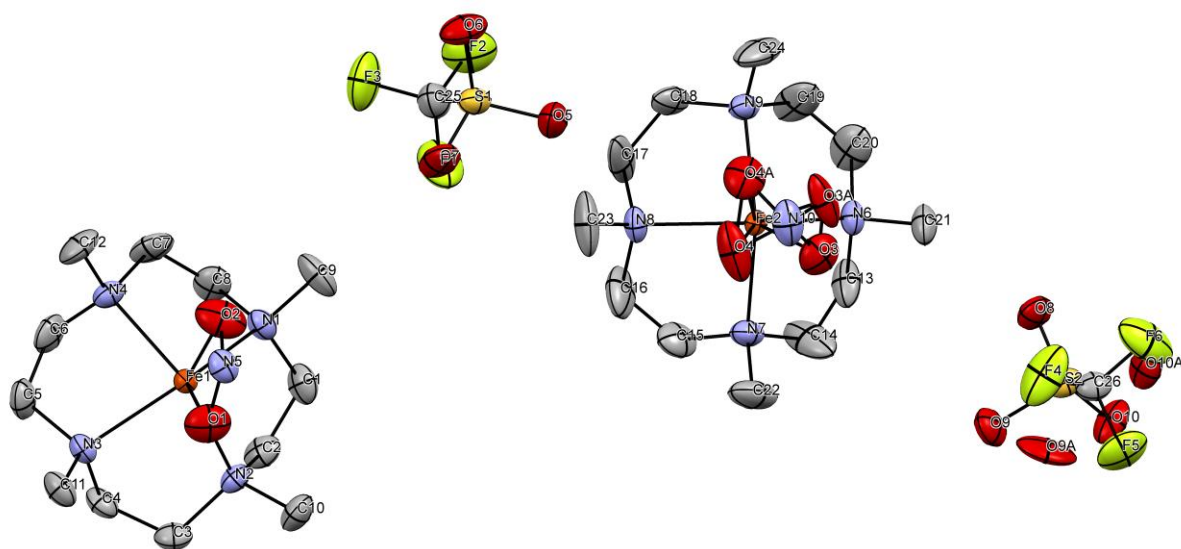

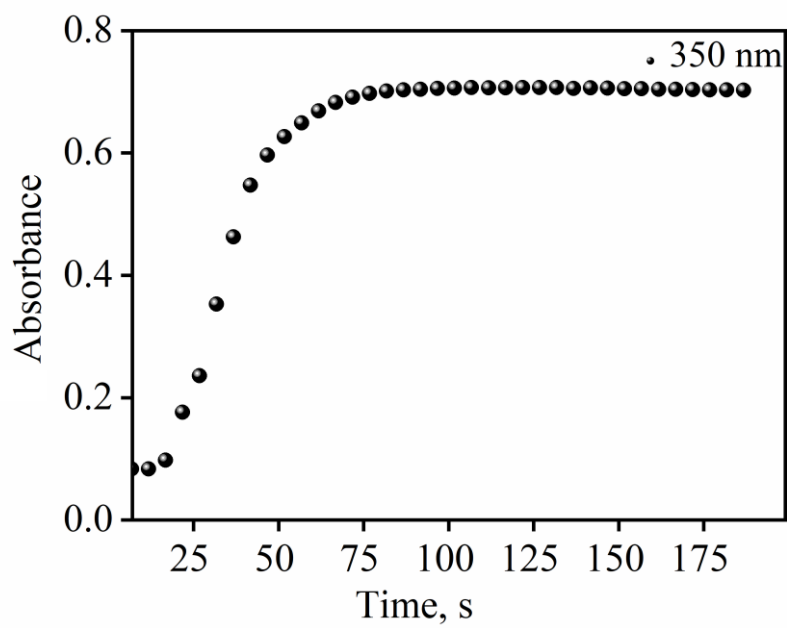

**Figure S6.** A time course of the formation of **3** (black circles). The reaction was monitored at 350 nm upon adding H<sup>+</sup> (one equiv.) to a solution of **2** (0.5 mM) in CH<sub>3</sub>CN at 233 K.

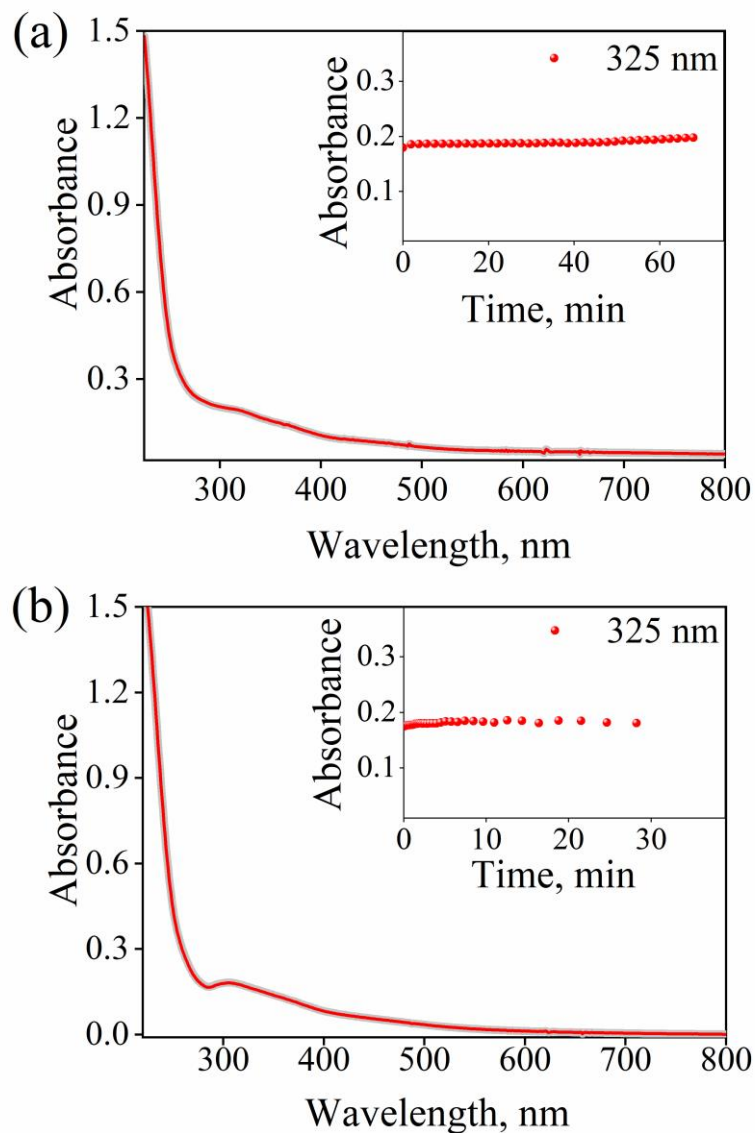

**Figure S7.** (a) UV-vis spectral changes of **2** (0.50 mM, Grayline to red line) in CH<sub>3</sub>CN under Ar at 298 K. The inset shows the time course of the natural decay of **2** (red circles) monitored at 325 nm (b) UV-vis spectral changes of **2** (0.50 mM, Grayline to red line) upon the addition of tetrabutylammonium hydroxide (0.50 mM) in CH<sub>3</sub>CN under Ar at 298 K. The inset shows the time course of the decay of **2** (red circles) monitored at 325 nm.

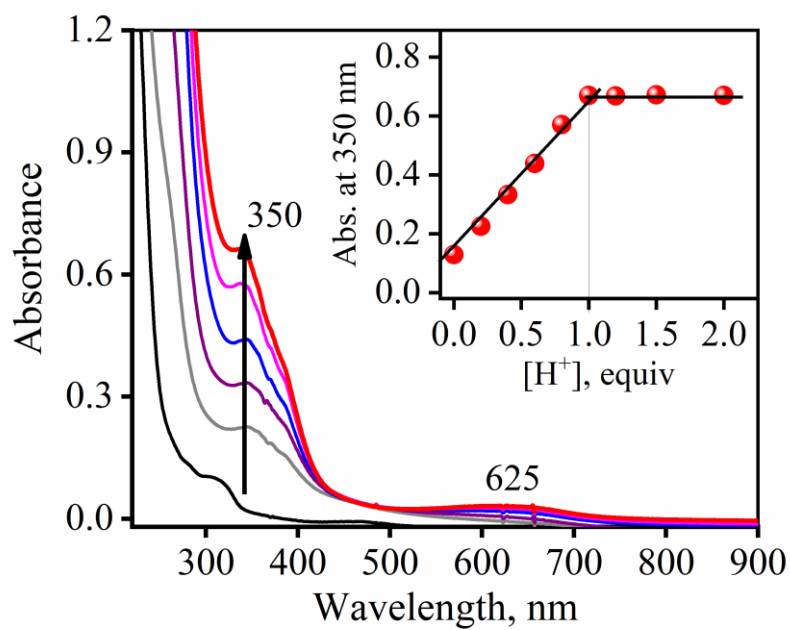

**Figure S8.** UV-vis spectral changes observed in the reaction **2** with H<sup>+</sup> (in the increments of 0, 0.20, 0.40, 0.60, 0.8, 1.0, 1.2, 1.5, 2 equiv.) in CH<sub>3</sub>CN under Ar at 298 K.

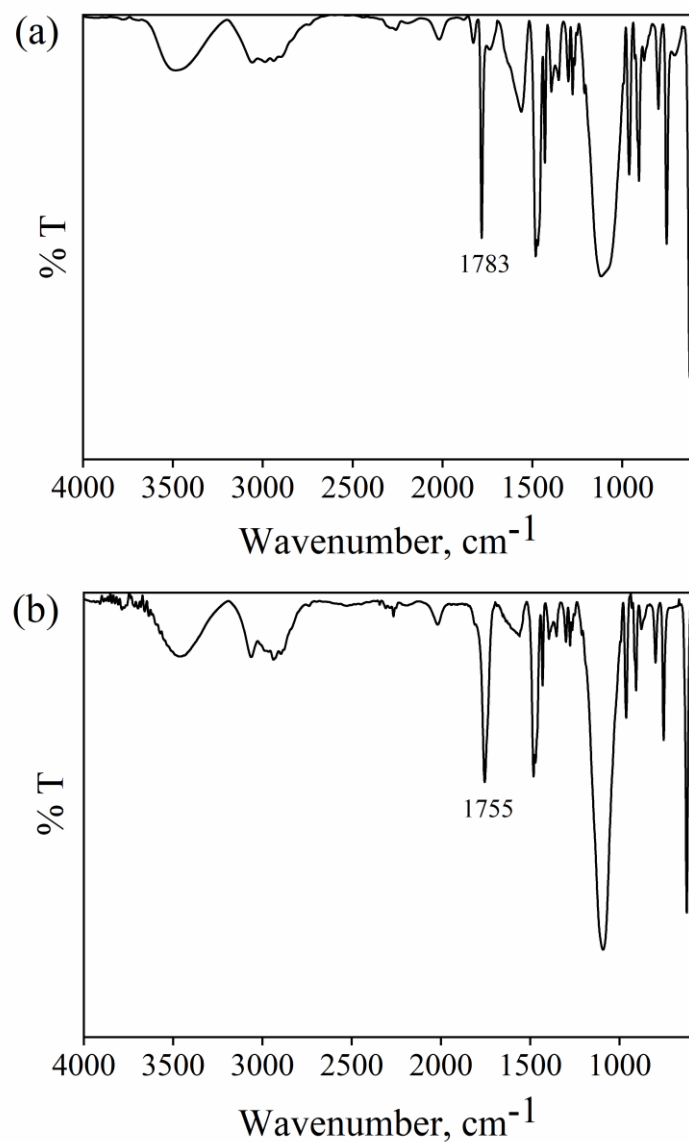

**Figure S9.** FT-IR spectrum of (a) **3** isolated from the reaction of **2** + H<sup>+</sup> recorded in KBr pellet at 298 K. The spectrum showed the peaks for the aliphatic chain (at 2940 cm<sup>-1</sup>) and Fe-bound <sup>14</sup>NO moiety (at 1783 cm<sup>-1</sup>). (b) **3** isolated from the reaction of **2** (with Fe<sup>II</sup>-bound <sup>15</sup>NO<sub>2</sub><sup>-</sup> anion) + H<sup>+</sup> recorded in KBr pellet at 298 K. The spectrum showed the peaks for Fe-bound <sup>15</sup>NO moiety (at 1755 cm<sup>-1</sup>).

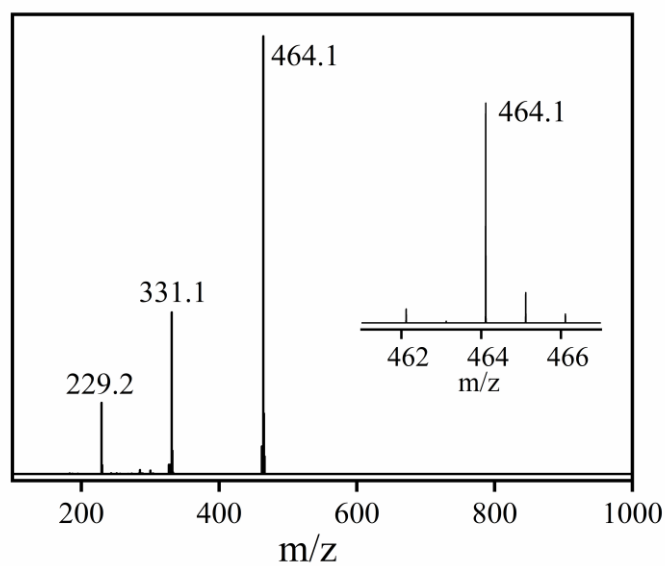

**Figure S10.** ESI-MS spectrum of **3**, formed in the reaction of **2** (with Fe<sup>II</sup>-bound <sup>15</sup>NO<sub>2</sub><sup>-</sup> anion) + H<sup>+</sup> (one- equiv.), in CH<sub>3</sub>CN at 233K. The peak at *m/z* 464.1, 331.1, and 229.2 are assigned to be [(12TMC)Fe(<sup>15</sup>NO)(OTf)]<sup>+</sup>, [(12TMC)Fe(<sup>15</sup>NO<sub>2</sub><sup>-</sup>)]<sup>+</sup> and [12TMC-H<sup>+</sup>]<sup>+</sup> (M+1), respectively.

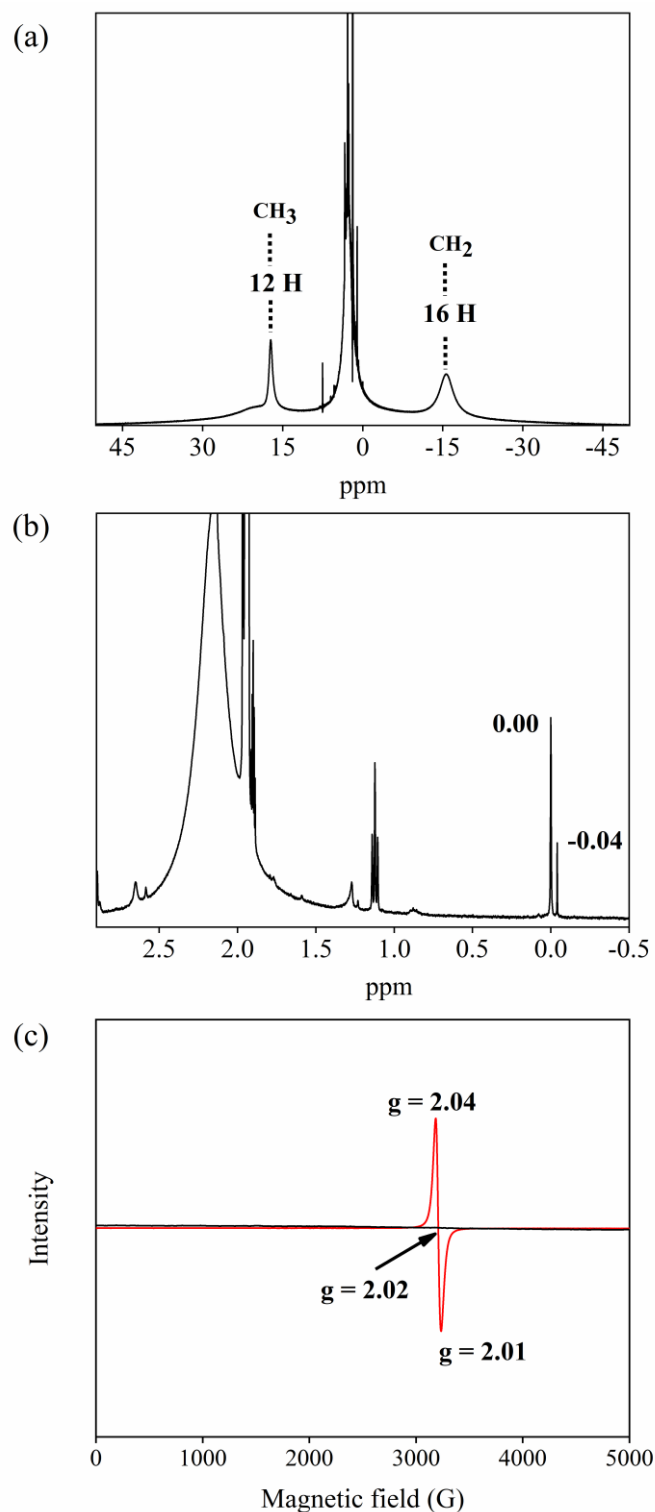

**Figure S11.** (a) Long-range  $^1\text{H-NMR}$  (400 MHz) spectrum of the isolated product (**3**) from the reaction of **2** (20 mM) with  $\text{H}^+$  (one-equiv.) in  $\text{CD}_3\text{CN}$ . (b)  $^1\text{H-NMR}$  (400 MHz) spectrum of **3** (4 mM) in  $\text{CD}_3\text{CN}$  (0.1 % TMS), recorded in a coaxial NMR tube, with inside  $\text{CD}_3\text{CN}$  (1.0 % TMS) at RT. (c) EPR of Isolated **3** (red line) and **2** (black line) in  $\text{CH}_3\text{CN}$  at 77 K.



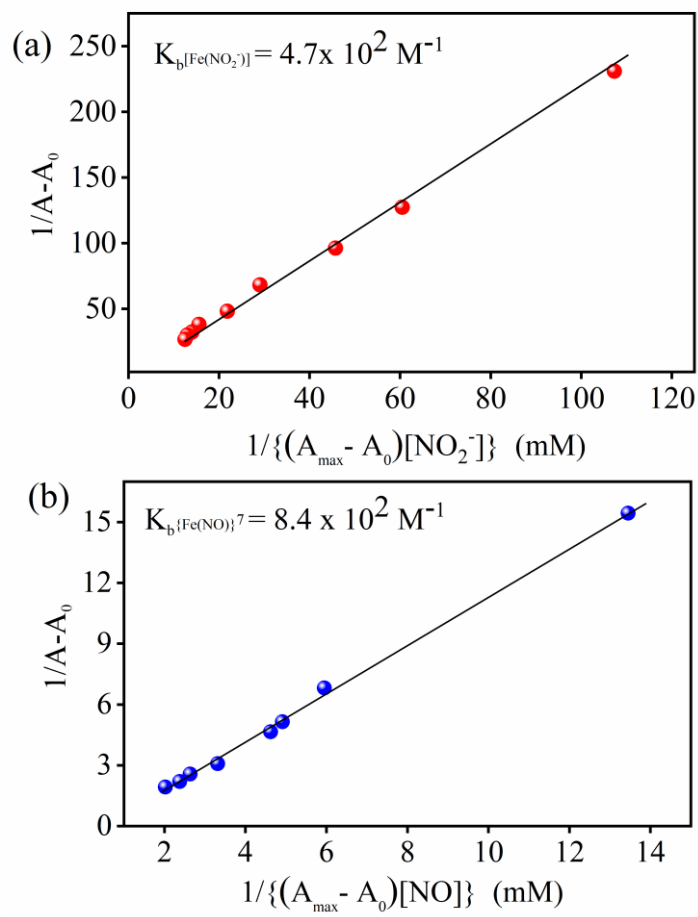

**Figure S12.** Binding constants values of (a) Fe<sup>II</sup>-center bound NO<sub>2</sub><sup>-</sup> in **2** and (b) Fe<sup>II</sup>-center bound NO in **3**. These values were calculated using the Benesi-Hildebrand equation.

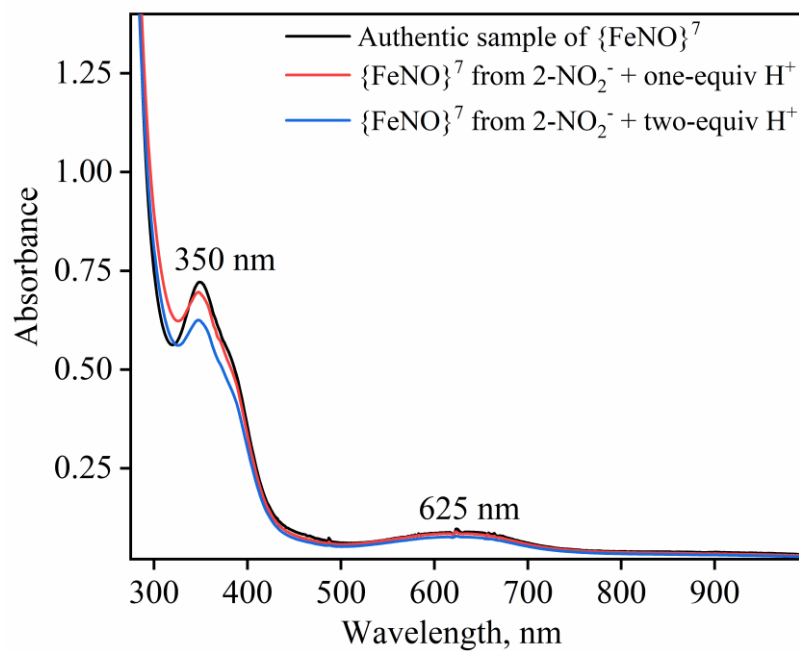

**Figure S13.** UV-vis spectral comparison of authentic sample **3** (black line) prepared from passing NO<sub>(g)</sub> to the CH<sub>3</sub>CN solution of **1**, the reaction mixture of **2** + one equiv. H<sup>+</sup> (red line) in CH<sub>3</sub>CN at 233 K and the reaction mixture of **2** + two equiv. H<sup>+</sup> (red line) in CH<sub>3</sub>CN at 233 K.

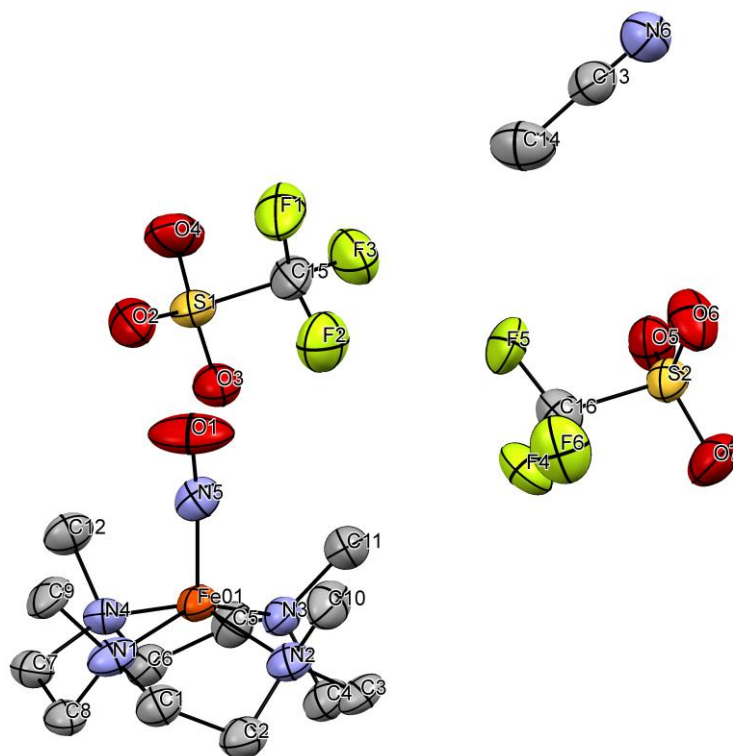

**Figure S14.** Displacement ellipsoid plots of **3** with 50 % probability. Disordered C-atoms in the TMC ring and the H atoms have been removed for clarity.

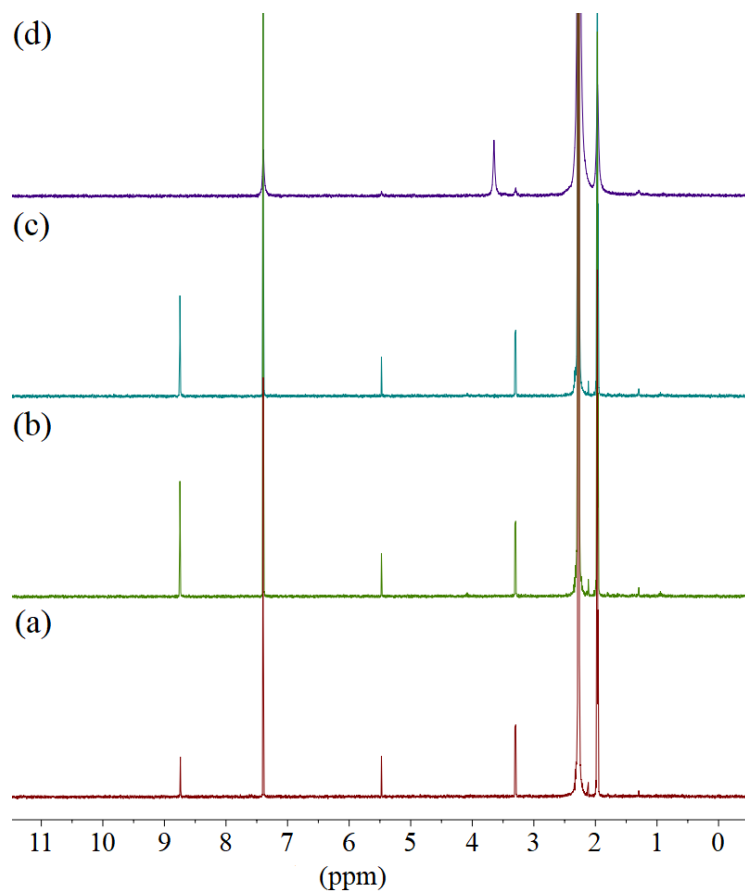

**Figure S15.**  $^1\text{H-NMR}$  (400 MHz) spectra of (a) **2** (10 mM) +  $\text{H}^+$  (10 mM) (b) **3** (10 mM) +  $\text{H}_2\text{O}_2$  (5 mM), (c)  $\text{H}_2\text{O}_2$  (5mM), and (d) **2** (10 mM) +  $\text{H}^+$  (20 mM), having benzene (10 mM) as an internal standard in  $\text{CD}_3\text{CN}$  at RT.

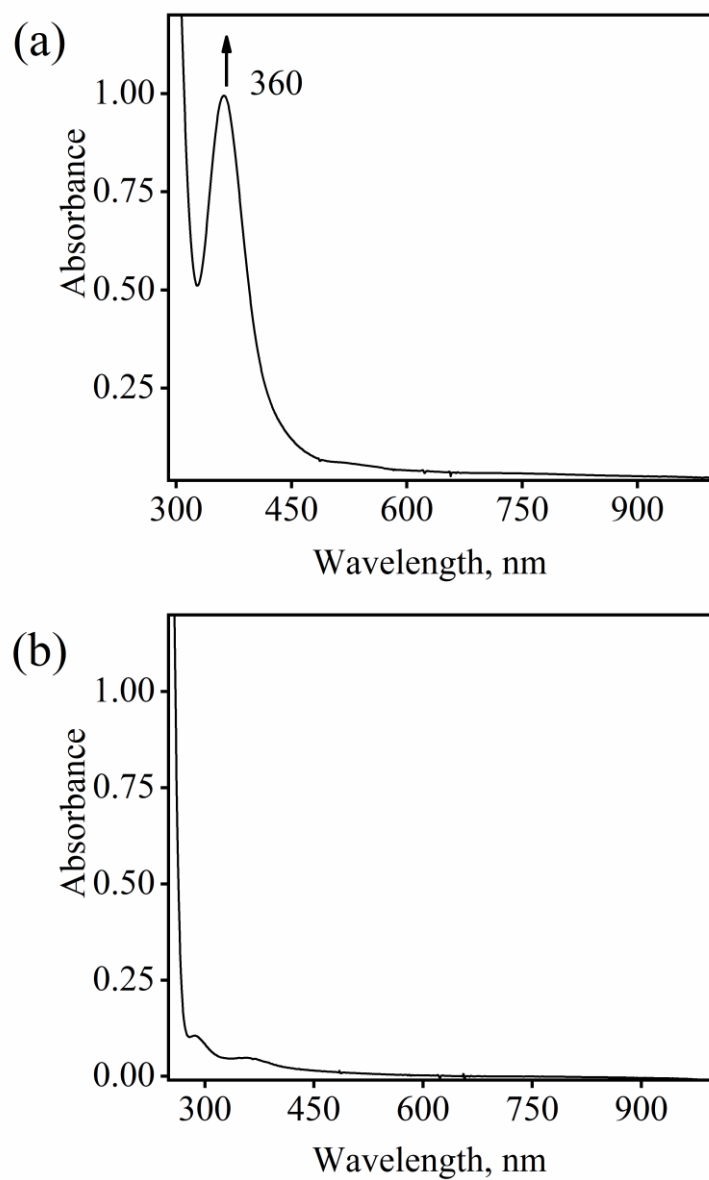

**Figure S16.** (a) UV-vis spectrum of the reaction mixture of **2** (0.1mM) + H<sup>+</sup> (0.1 mM) + sodium iodide (0.15 mM) in CH<sub>3</sub>CN at 298 K. (b) UV-vis spectrum of the reaction mixture of **2** (0.1 mM) + H<sup>+</sup> (0.2 mM) + sodium iodide (0.15 mM) in CH<sub>3</sub>CN at 298 K.

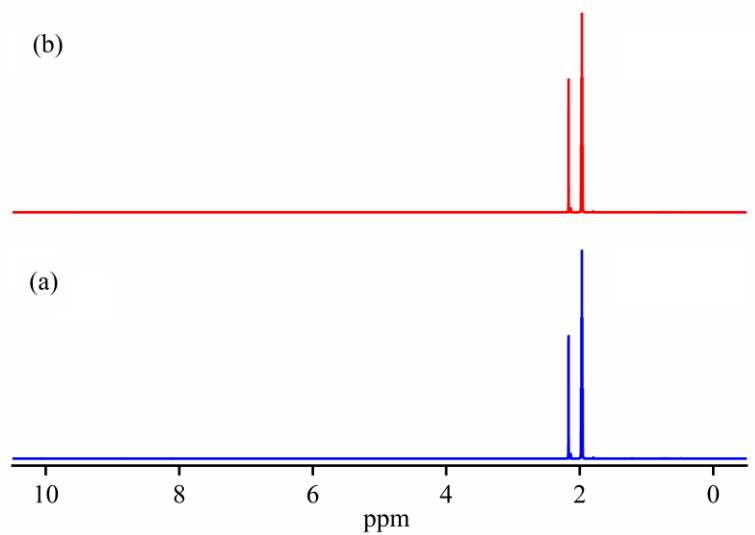

**Figure S17.** <sup>1</sup>H-NMR (400 MHz) spectra of (a) **2** (10 mM) and (b) **2** (10 mM) + D<sup>+</sup> (20 mM) in CD<sub>3</sub>CN at RT.

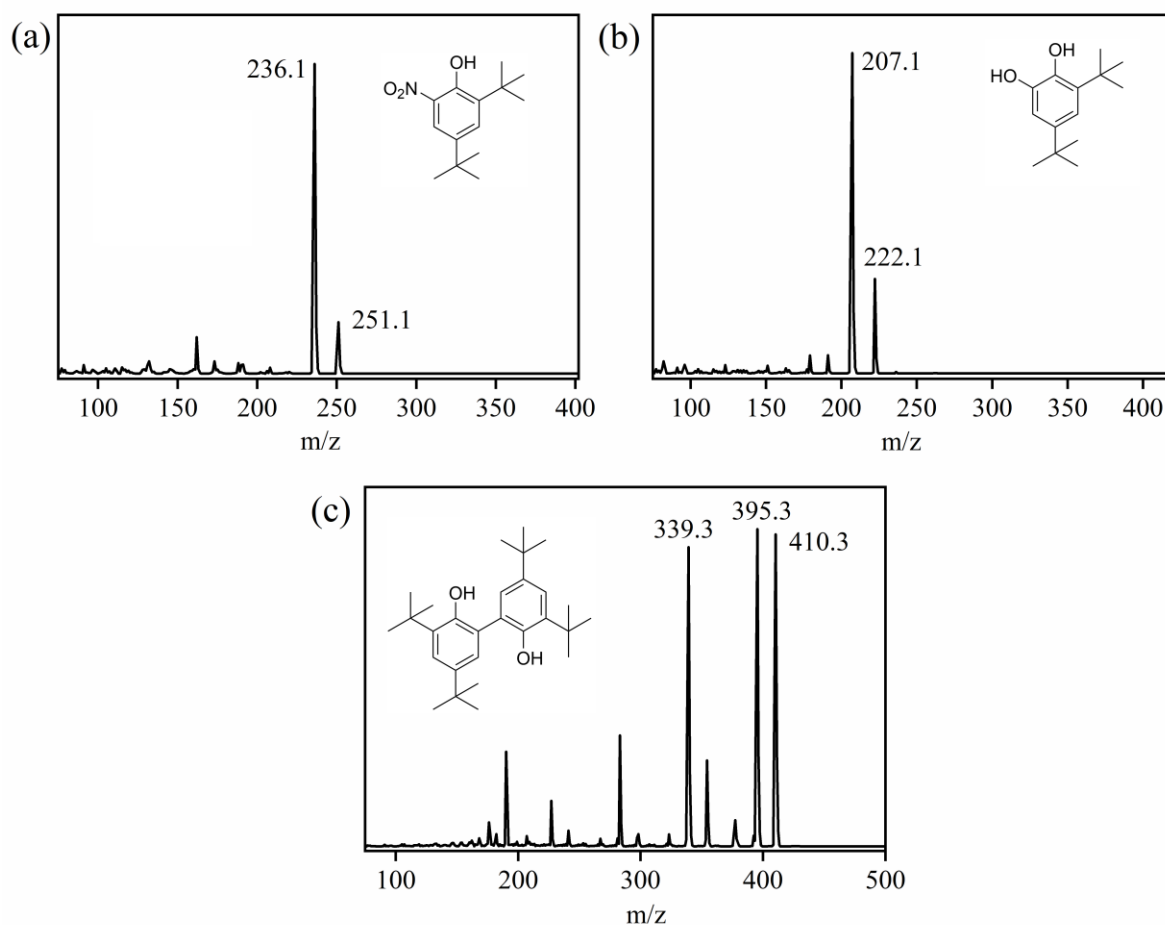

**Figure S18.** GC-MS characterization of the reaction mixture of **2** (1mM) + one equiv. of H<sup>+</sup> (1mM) + 2,4-DTBP (2.5mM). (a) nitro-2,4-DTBP (nitro-2,4-DTBP): The peaks at  $m/z$  251.1 and 236.1 are assigned to be nitro-2,4-DTBP and loss of CH<sub>3</sub> from nitro-2,4-DTBP. (b) 3,5-Di-*tert*-butylcatechol (3,5-DTBC); The peak at  $m/z$  value 222.1, 207.1 are assigned to 3,5-DTBC and CH<sub>3</sub> loss from 3,5-DTBC respectively. (c) 2,4-DTBP-dimer (2,4-DTBP-D); The peaks at  $m/z$  410.3, 395.3, and 339.3 are assigned to be 2,4-DTBP-D, loss of CH<sub>3</sub> from 2,4-DTBP-D, loss of C<sub>4</sub>H<sub>8</sub> and CH<sub>3</sub> from 2,4-DTBP-D. The peaks were compared with the NIST standard library.

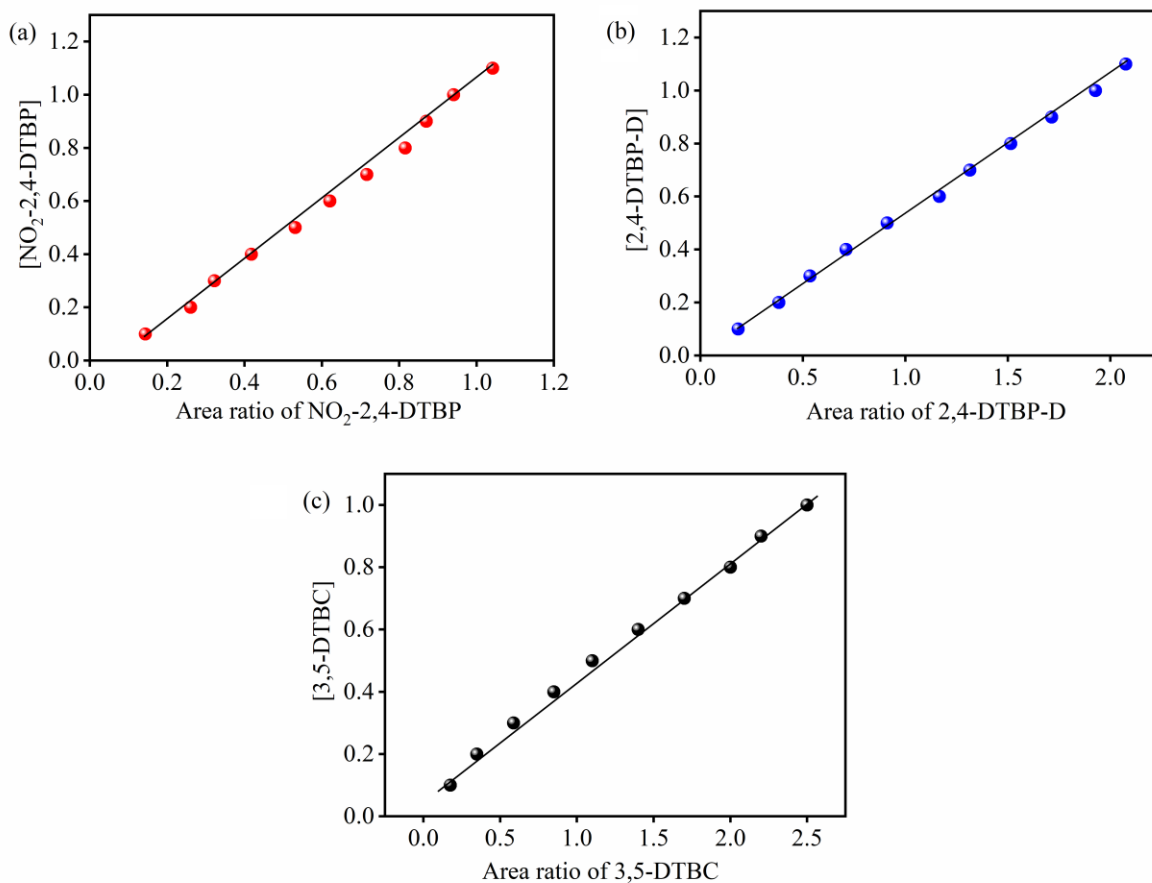

**Figure S19.** HPLC calibration plot for (a) nitro-2,4- DTBP, (b) 2,4-DTBP-D, and (c) 3,5-DTBC.



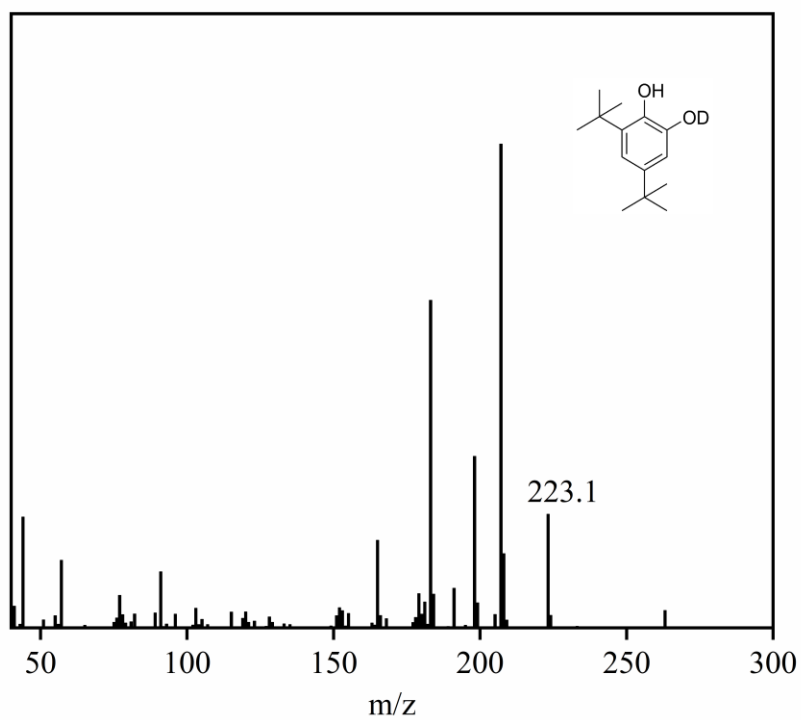

**Figure S20.** GCMS characterization of 3,5-DTBC(D) from the reaction mixture of **2** (1mM) + one equiv. of  $D^+$  (1mM) + 2,4-DTBP (2.5mM).

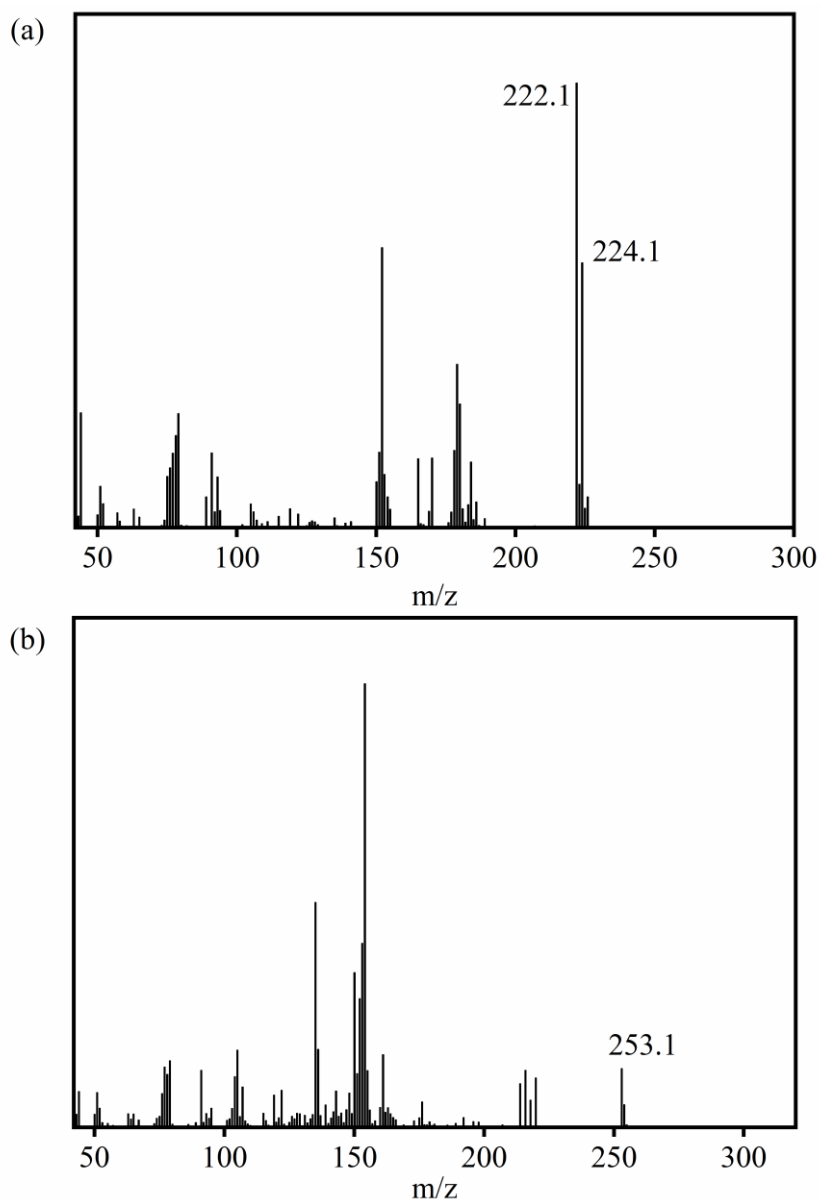

**Figure S21.** GCMS characterization of (a) 3,5-Di-tert-butylcatechol [3,5-DTBC(<sup>18</sup>OH)]; The peak at m/z value 224.1, 222.1 are assigned to 3,5-DTBC (<sup>18</sup>OH) and 3,5-DTBC(<sup>16</sup>OH) respectively. (b) The peak at 253.1 is assigned to be nitro-2,4-DTBP(<sup>16</sup>ON<sup>18</sup>O), in the reaction mixture of  $2\text{-}^{16}\text{ON}^{18}\text{O}^-$  with one equiv. of  $\text{H}^+$ .

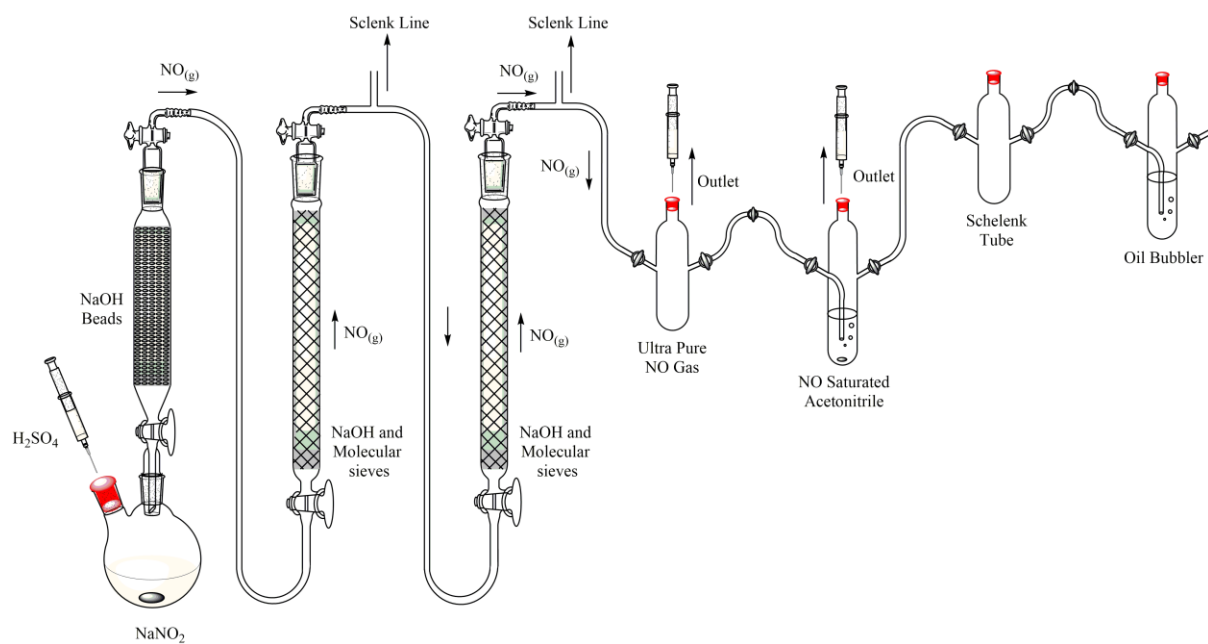

**Figure S22.** Schematic diagram showing the generation and purification setup for NO.
